# Supplementary material
Source: Springer Nature journal article supplement (https://www.springermedizin.de/resource/supplementary/12891_2012_1737_MOESM1_ESM.pdf/9508452)

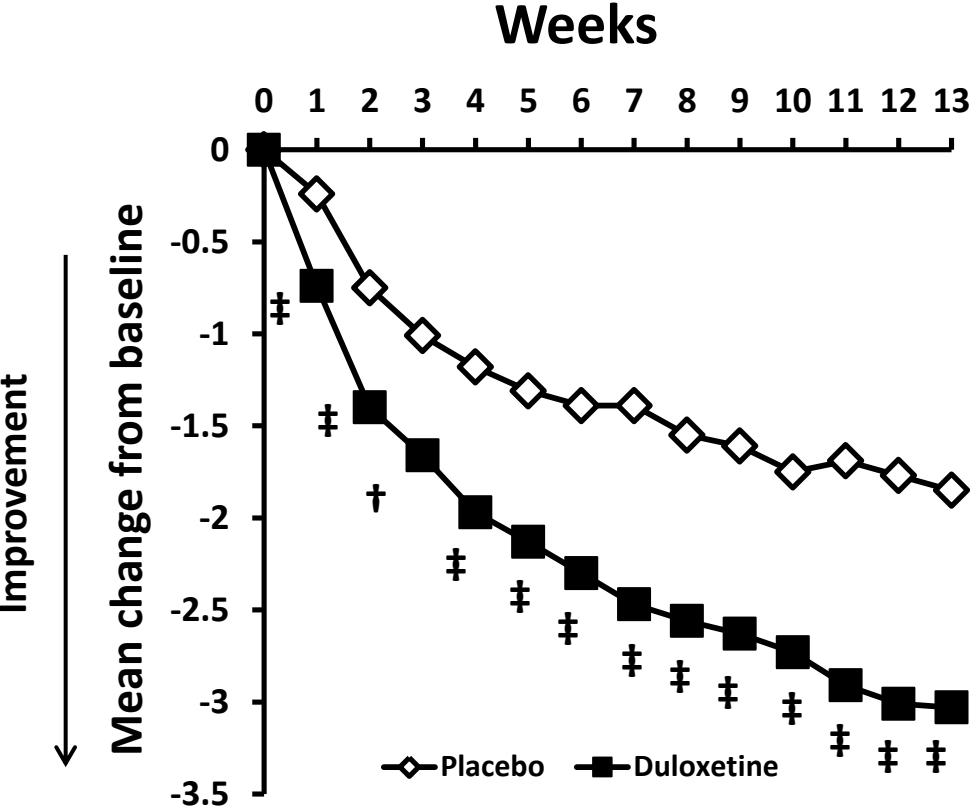

**Older Patients**

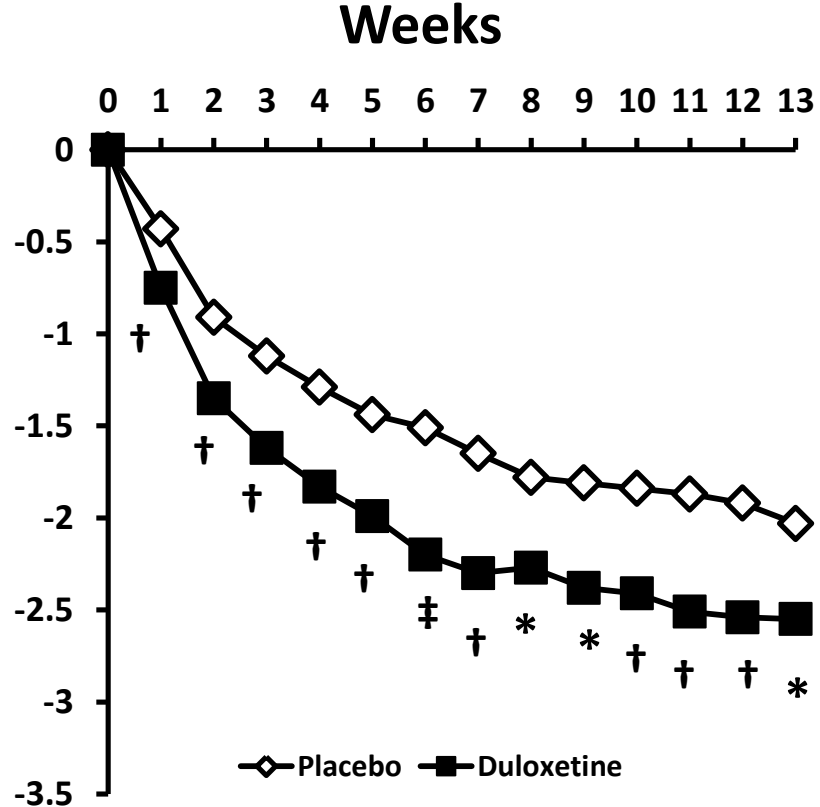

**Younger Patients**

\* p≤.05, † p≤.01, ‡p≤.001

Week-by-treatment-by-age group interaction, p=.72

Supplement: MOESM1 [file 9508452]
